# Supplementary material for: Three-dimensional porphyrin-based covalent organic frameworks with tetrahedral building blocks for single-site catalysis
Source: Royal Society of Chemistry journal article supplement (doi:10.1039/c9nj04017j), 2019-01-01
Supplement: c9nj04017j1.pdf [file c9nj04017j1.pdf]

*Supporting Information for*

**Three-dimensional porphyrin-based covalent organic frameworks with tetrahedral building blocks for single-site catalysis**

*Yong Liu,<sup>‡a</sup> Xiao-dong Yan,<sup>‡a</sup> Tao Li,<sup>a</sup> Wen-Da Zhang,<sup>a</sup> Qiu-Ting Fu,<sup>a</sup>*

*Hui-Shu Lu,<sup>a</sup> Xuan Wang,<sup>a</sup> and Zhi-Guo Gu<sup>\*a,b</sup>*

*a. Key Laboratory of Synthetic and Biological Colloids, Ministry of Education, School of Chemical and Material Engineering, Jiangnan University, Wuxi 214122, P.R. China. E-mail: zhiguogu@jiangnan.edu.cn.*

*b. International Joint Research Center for Photoresponsive Molecules and Materials, School of Chemical and Material Engineering, Jiangnan University, Wuxi 214122, P.R. China.*

*<sup>‡</sup> These authors contributed equally.*

E-mail: [zhiguogu@jiangnan.edu.cn](mailto:zhiguogu@jiangnan.edu.cn)

**Contents**

|                                                                         |           |
|-------------------------------------------------------------------------|-----------|
| <b>1. General information.....</b>                                      | <b>2</b>  |
| <b>2. The synthesis and characterization of TFBM .....</b>              | <b>4</b>  |
| <b>3. The synthesis and characterization of TAPP.....</b>               | <b>7</b>  |
| <b>4. The synthesis and characterization of TABPP.....</b>              | <b>9</b>  |
| <b>5. The synthesis and characterization of MC .....</b>                | <b>11</b> |
| <b>6. The characterization of PCOF, PCOF-Fe and PCOF-Co .....</b>       | <b>13</b> |
| <b>7. The stability of PCOF-1 and PCOF-2 .....</b>                      | <b>18</b> |
| <b>8. Biomimetic catalysis characterization.....</b>                    | <b>19</b> |
| <b>9. Electrochemical characterization .....</b>                        | <b>23</b> |
| <b>10. Crystallographic data for TFBM and MC .....</b>                  | <b>25</b> |
| <b>11. The fractional atomic coordinates of PCOF-1 and PCOF-2 .....</b> | <b>29</b> |
| <b>Reference.....</b>                                                   | <b>38</b> |

---

## 1. General information

$^1\text{H}$  NMR (400 MHz) and  $^{13}\text{C}$  NMR (101 MHz) spectra were recorded in Dimethyl sulfoxide- $d_6$  at room temperature on a Bruker using TMS as the internal reference. Fourier transform infrared (FT-IR) spectra were recorded on a NICOLET 6700 FTIR Spectrometer. Solid-state  $^{13}\text{C}$  cross-polarization magic-angle spinning (CP/MAS) NMR measurement was performed with a Bruker AVANCE III 500 spectrometer. UV-Vis absorbance spectra were collected on UV-3600 Plus UV-VIS-NIR spectrophotometer. Scanning Electron Microscopy (SEM, HitachiS-4800) accompanied by Energy dispersive X-ray spectrometry (EDX; accelerated voltage: 20 kV) was used to further study the morphology and the elements distribution of the samples. The X-ray photoelectron spectra (XPS) were carried out by Multifunctional imaging electron spectrometer (Thermo ESCALAB 250XI), from which can analyze the composition of elements. The inductively coupled plasma (ICP) measurements were recorded on a Leeman lab, inc. Profile Plus high dispersion ICP. UV-Vis-IR diffuse reflectance spectrum (Kubelka-Munk spectrum) was recorded on a JASCO model V-670 spectrometer equipped with integration sphere model IJN-727. Powder electrical conductivity was recorded on a Suzhou Jingge ST2253 by four-probe method. The nitrogen sorption isotherms and pore-size distribution curves were measured at the temperature of liquid nitrogen (77 K) by using an automatic volumetric adsorption equipment (Micromeritics, ASAP2010). Thermal gravimetric analysis (TGA) measurement was performed on a TGA/1100SF thermo gravimetric analyzer. Transmission electron microscopy (TEM) images were obtained on a JEOL model JEM-2100 microscope to further study the morphology. Powder X-ray diffraction (PXRD) data were collected on a D 8 Advance X-ray diffractometer (Bruker AXS Germany) with Cu  $K\alpha$  radiation at 40 kV 200 mA with scanning rate of  $2^\circ \cdot \text{min}^{-1}$  ( $2\theta$ ) at room temperature. The crystal structures were determined on a Siemens (Bruker) SMART CCD diffractometer using monochromated Mo  $K\alpha$  radiation ( $\lambda = 0.71073 \text{ \AA}$ ). Cell parameters were retrieved using SMART software and

---

refined using SAINT on all observed reflections.<sup>1</sup> The highly redundant data sets were reduced using SAINT and corrected for Lorentz and polarization effects. Absorption corrections were applied using SADABS supplied by Bruker.<sup>2</sup> Structures were solved by direct methods using the program SHELXL-2014/7.<sup>3</sup> In model compound MC, the unit cell includes some disordered solvent molecules, which could not be modeled as discrete atomic sites. Accordingly, the SQUEEZE<sup>4</sup> function of PLATON<sup>5</sup> was employed to remove this contribution from the model. The formula and parameters in Table S4 do not include solvent.

## 2. The synthesis and characterization of 3,3',5,5'-tetrakis(4-formylphenyl)bimesityl (TFBM)

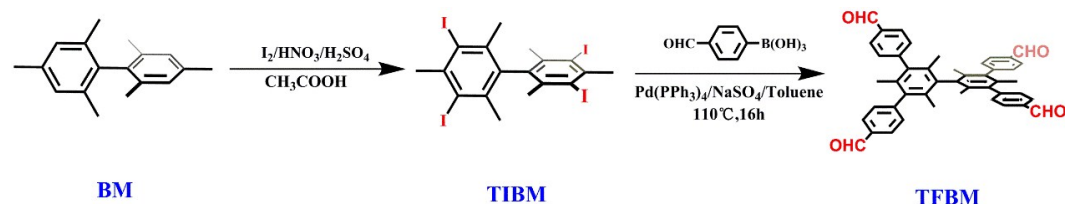

TFBM was synthesized according to a previous method with slight modification.<sup>6</sup> To a 100 mL round bottom flask, bimesityl (4.76 g, 20.0 mmol) in 2.5 mL of  $CHCl_3$  and 12 mL of  $CH_3COOH$ , and iodine (11.18 g, 44 mmol) were added under nitrogen atmosphere. Then  $HNO_3$  (19 mL) and  $H_2SO_4$  (19 mL) were added to the solution with stirring at room temperature. After stirring for 3 h, the mixture was poured into ice, washed with 2M NaOH and saturated  $Na_2S_2O_3$  solution. The resultant precipitate was filtered and recrystallized from ethyl acetate to obtain 3,3',5,5'-tetraiodobimesityl (12 g, 80 %). In a 120 mL pressure tube, 3,3',5,5'-tetraiodobimesityl (0.742 g, 1 mmol) was dispersed in 20 mL of toluene and 20 mL of saturated  $NaHCO_3$  solution, and then 4-formylphenylboronic acid (1.51 g, 10 mmol) and  $Pd(PPh_3)_4$  (0.576 g, 0.5 mmol) were added under nitrogen atmosphere. The reaction mixture was heated at  $110^\circ C$  for 16 h, and the yellow turbid solution turned to dark brown. The mixture was cooled down to room temperature and extracted with ethyl acetate ( $3 \times 20$  mL). The extracts were washed with deionized water and dried over saturated  $Na_2SO_4$ . The product was purified by column chromatography with silica gel using ethyl acetate and petroleum ether mixture (5:95) as an eluent, and dried by vacuum oven to obtain white solid of TFBM. Yield: 20 %. Anal. Calcd (%) for  $C_{46}H_{38}O_4$ : C, 84.38; H, 5.85; O, 9.77. Found: C, 84.34; H, 5.86; N, 9.80; ATR-FTIR  $cm^{-1}$ : 3042, 1691, 1602;  $^1H$  NMR ( $CDCl_3$ , 400MHz,  $\delta/ppm$ )  $\delta$  1.70 (s, 6H), 1.71 (s, 12 H), 7.41 (d, 8H), 7.98 (d, 8H), 10.10 (s, 4H);  $^{13}C$  NMR (100 MHz,  $CDCl_3$ )  $\delta$  18.33, 19.23, 130.06, 130.28, 131.46, 132.62, 135.07, 138.56, 139.34, 148.72, 191.97; MS (EI) m/z: 655  $M^+$ .

The single crystals of TFBM were grown by a solution diffusion method. In a 15 mL test tube, a mixture of dichloromethane and methanol (v/v, 1:1, 4 mL) was gently

layered on the top of a 3 mL dichloromethane solution of TFBM (30 mg, 0.046 mmol), and then 4 mL methanol was added carefully as a third layer. After two weeks, colorless crystals were collected, then washed with H<sub>2</sub>O and dried in atmosphere.

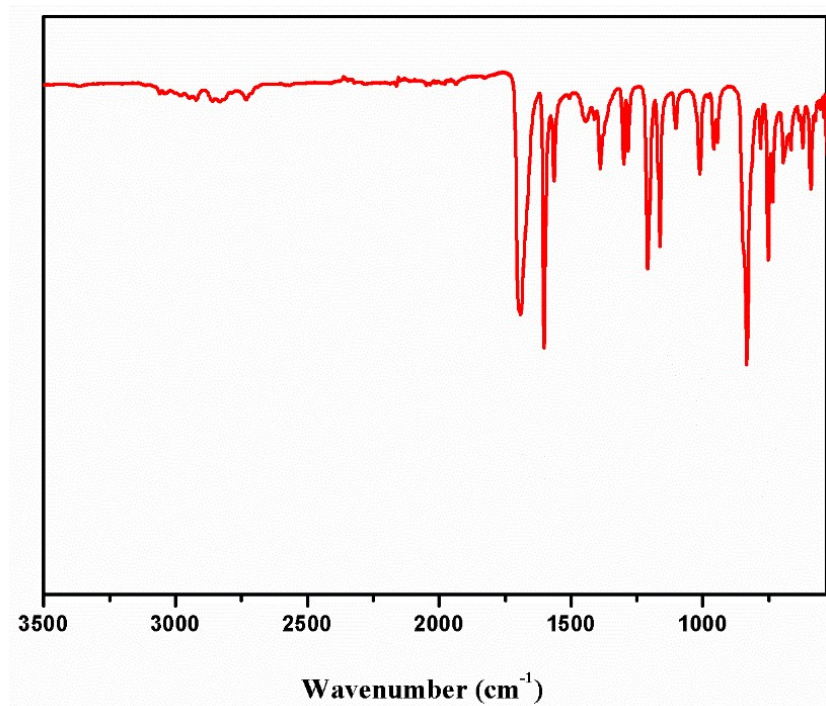

**Fig. S1** The ATR-FTIR spectrum of TFBM.

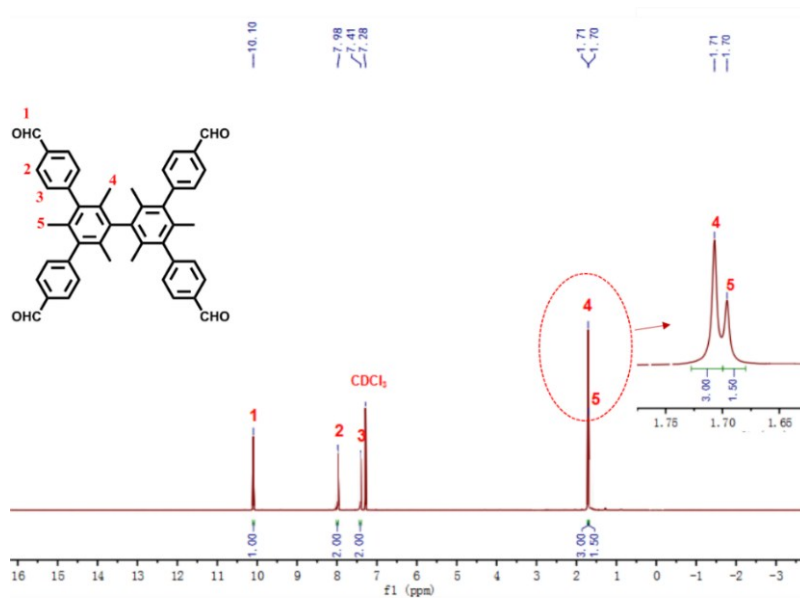

**Fig. S2** The <sup>1</sup>H NMR spectrum of TFBM.

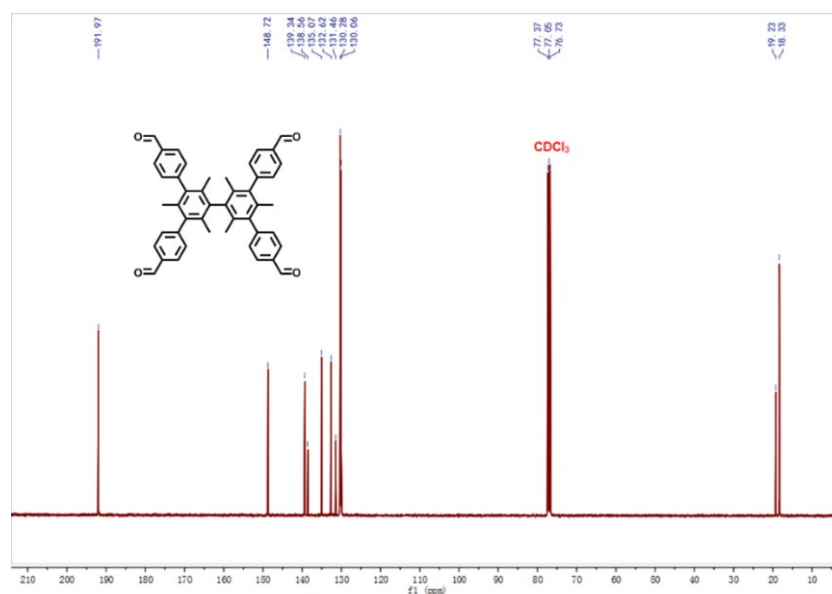

**Fig. S3** The  $^{13}\text{C}$  NMR spectrum of TFBM.

### 3. The synthesis and characterization of 5, 10, 15, 20-tetra(4-aminophenyl)porphyrin (TAPP)

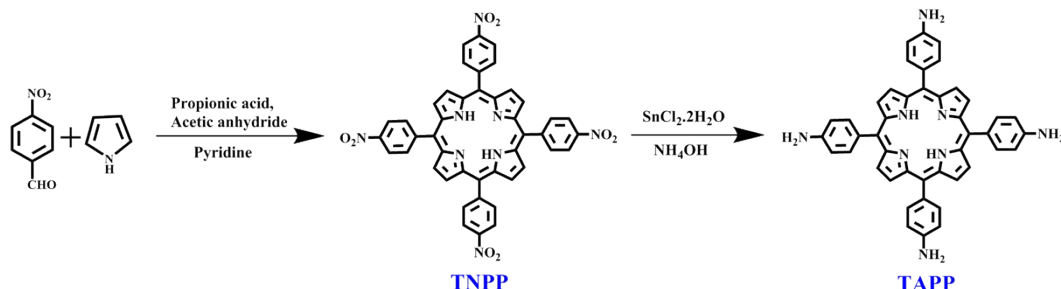

TAPP was synthesized according to previous methods with slight adjustment.<sup>7</sup> The pure product TAPP was finally isolated as purple powder. Yield: 23 %. Anal. Calcd (%) for  $\text{C}_{44}\text{H}_{34}\text{N}_8$ : C, 78.32; H, 5.08; N, 16.60. Found: C, 78.29; H, 5.09; N, 16.62; ATR-FTIR  $\text{cm}^{-1}$ : 3336, 1623, 1517, 1453, 1335, 1273, 1171, 955, 811, 741, 532;  $^1\text{H}$  NMR (DMSO, 400 MHz,  $\delta/\text{ppm}$ ): -2.7 (s, 2H), 5.58 (s, 8H), 7.01(d, 8H), 7.86(d, 8H), 8.89 (s, 8H);  $^{13}\text{C}$  NMR (101 MHz, DMSO,  $\delta$  ppm): 148.98, 135.92, 129.20, 121.04, 112.98; MS (EI)  $m/z$ : 674  $\text{M}^+$ .

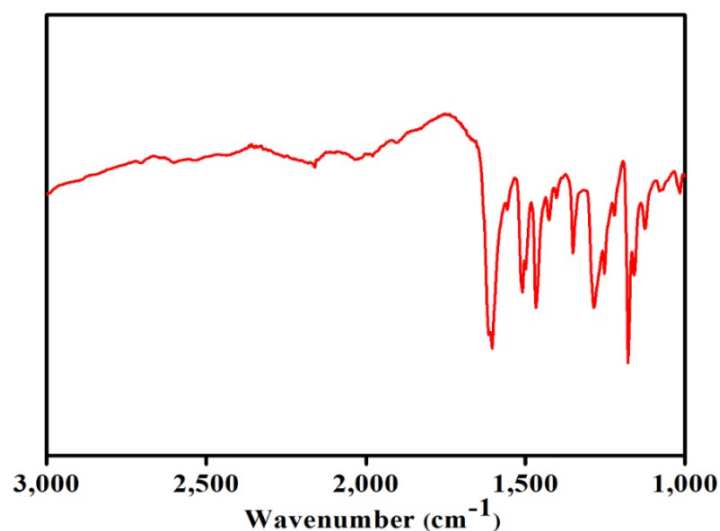

**Fig. S4** The ATR-FTIR spectrum of TAPP.

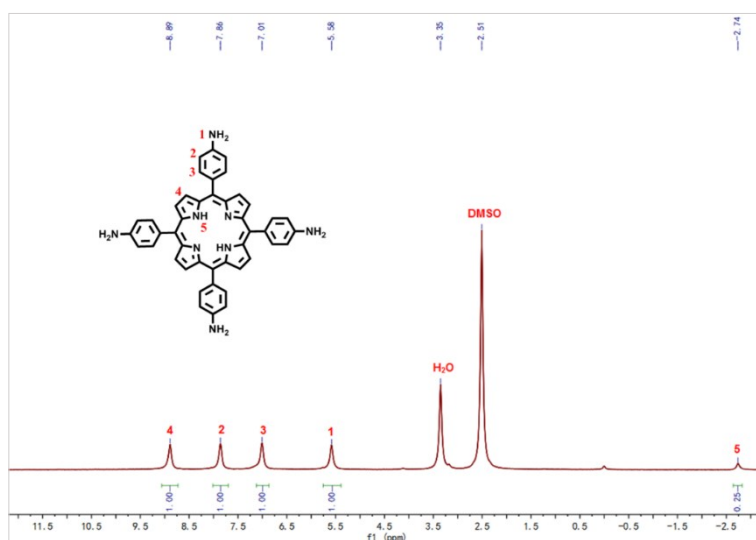

**Fig. S5** The  $^1\text{H}$  NMR spectrum of TAPP.

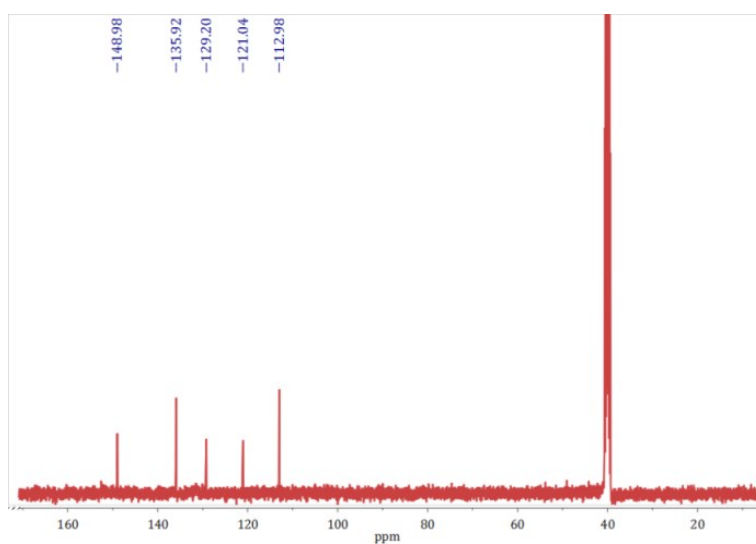

**Fig. S6** The  $^{13}\text{C}$  NMR spectrum of TAPP.



#### 4. The synthesis and characterization of 5, 10, 15, 20-tetra(4-aminobiphenyl)porphyrin (TABPP)

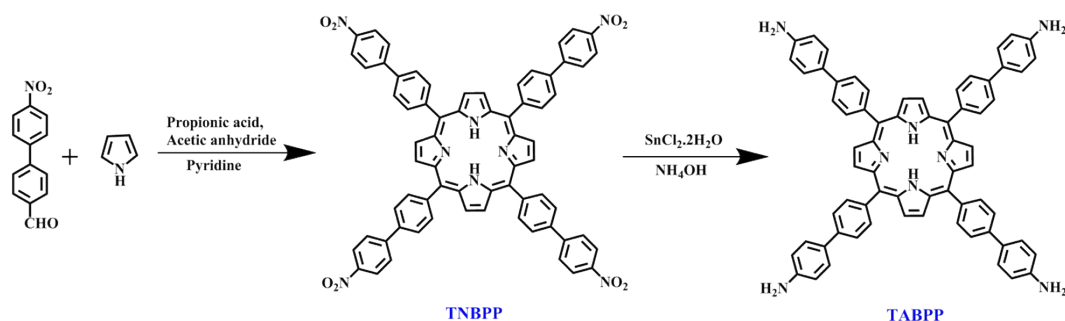

TABPP was synthesized using 4'-nitrobiphenyl-4-carbaldehyde (15 g, 66 mmol) following the procedures used for the preparation of TAPP. The pure product TABPP was finally isolated as purple powder.<sup>8</sup> Yield: 20 %. Anal. Calcd (%) for  $\text{C}_{68}\text{H}_{50}\text{N}_8$ : C, 83.41; H, 5.15; N, 11.44. Found: C, 83.43; H, 5.12; N, 11.45; ATR-FTIR  $\text{cm}^{-1}$ : 3366, 3216, 1618, 1499;  $^1\text{H}$  NMR (DMSO, 400 MHz,  $\delta/\text{ppm}$ ): -2.81 (s, 2H), 5.39 (s, 8H), 6.78 (d, 8H), 7.71(d, 8H), 7.98(d, 8H), 8.18 (d, 8H), 8.92 (s, 8H);  $^{13}\text{C}$  NMR (101 MHz, DMSO,  $\delta$  ppm): 149.25, 140.54, 138.94, 135.30, 127.96, 127.13, 124.19, 120.41, 114.93; MS (EI)  $m/z$ : 978.42  $\text{M}^+$ .

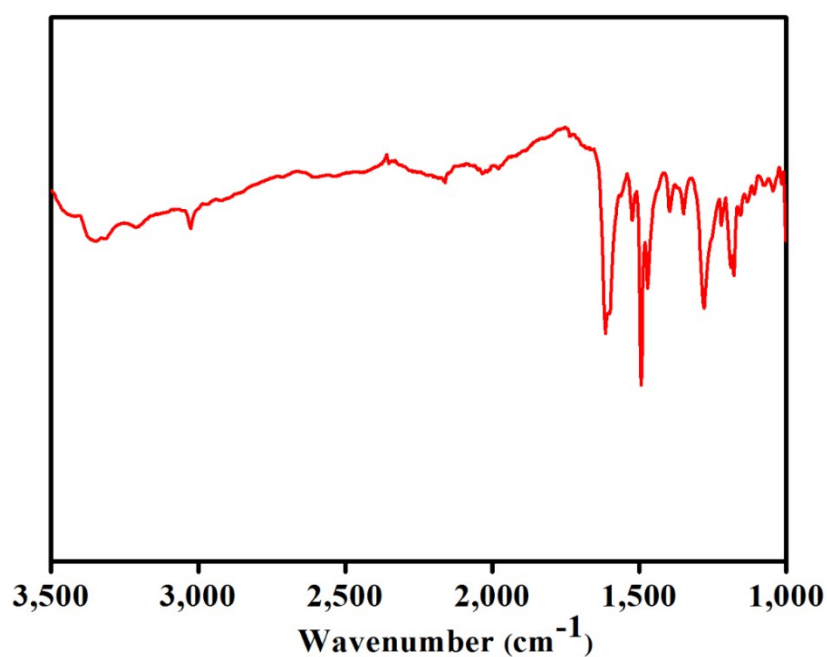

**Fig. S7** The ATR-FTIR spectrum of TABPP.

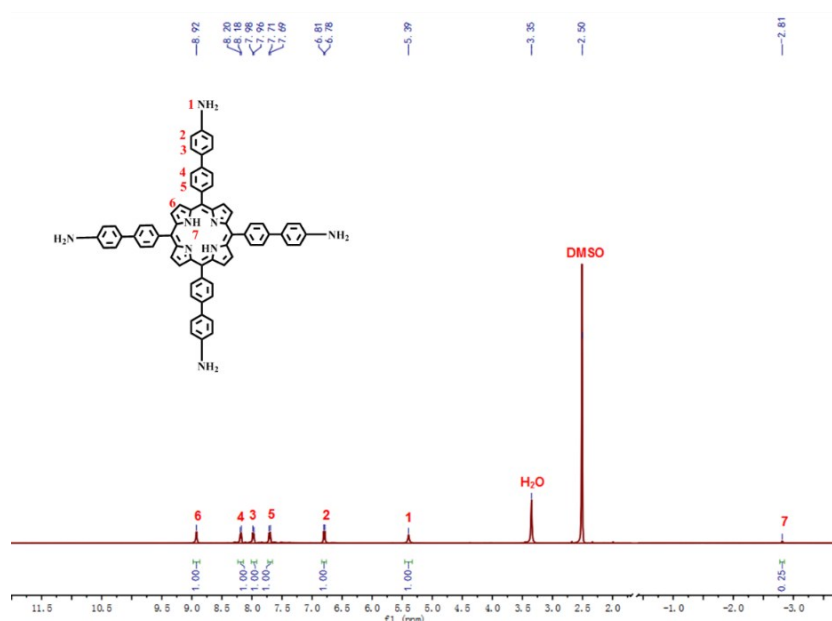

**Fig. S8** The  $^1\text{H}$  NMR spectrum of TABPP.

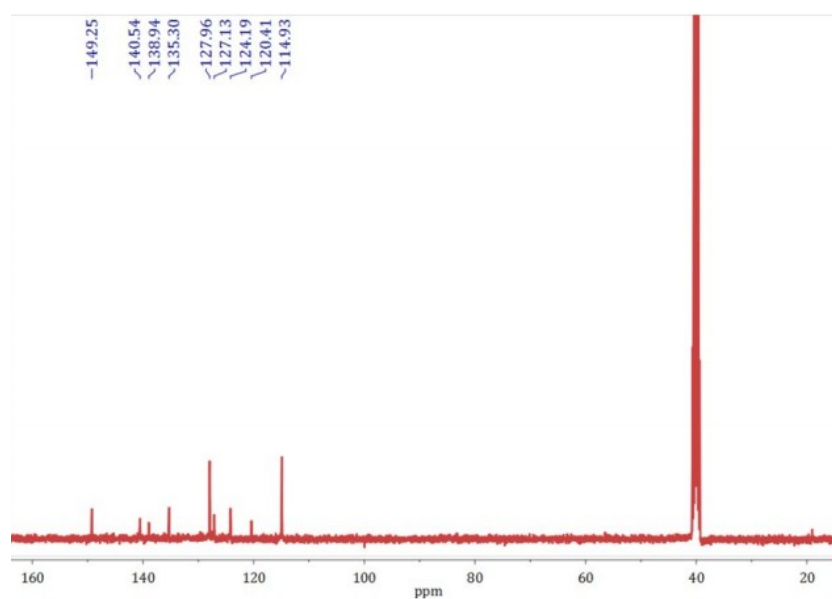

**Fig. S9** The  $^{13}\text{C}$  NMR spectrum of TABPP.

## 5. The synthesis and characterization of MC

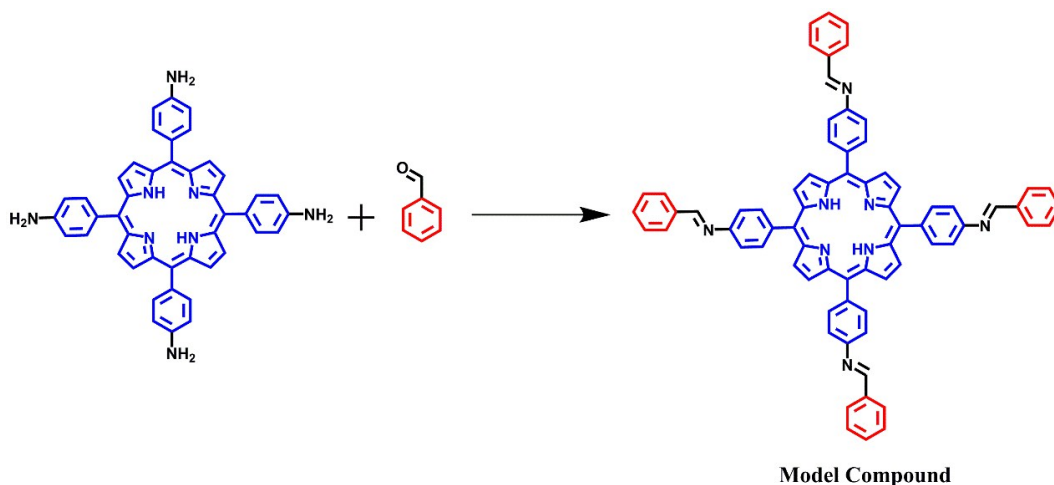

In a 25 mL round bottom flask, TAPP (67 mg, 0.1 mmol) and benzaldehyde (42 mg, 0.4 mmol) was dissolved in chloroform (10 mL) under nitrogen atmosphere. The mixture was refluxed for 6 h, then cooled to room temperature and filtered to obtain purple solution. The product was separated out by adding the absolute methanol (20 mL) in the purple solution, filtered and dried by vacuum oven to obtain purple solid of MC. Anal. Calcd (%) for  $C_{72}H_{50}N_8$ : C, 84.19; H, 4.91; N, 10.90. Found: C, 84.15; H, 4.93; N, 10.92; ATR-FTIR  $cm^{-1}$ : 3314, 3024, 1629, 1594, 1167;  $^1H$ -NMR ( $CDCl_3$ , 300 MHz,  $\delta/ppm$ ): -2.66 (s, 2H), 7.60 (t, 12H), 7.65 (d, 8H), 8.8.11 (m, 8H), 8.28 (d, 8H), 8.87 (s, 4H), 8.98 (s, 8H). MS (EI)  $m/z$ : 1027.42  $M^+$ .

The single crystals of MC were grown by a solution diffusion method. In a 20 mL test tube, a mixture of chloroform and methanol (v/v, 1:1, 5 mL) was gently layered on the top of a 3 mL purple solution and then 5 mL methanol was added carefully as a third layer. After three weeks, purple needle-like crystals of MC were collected, then washed with  $H_2O$  and dried in atmosphere.

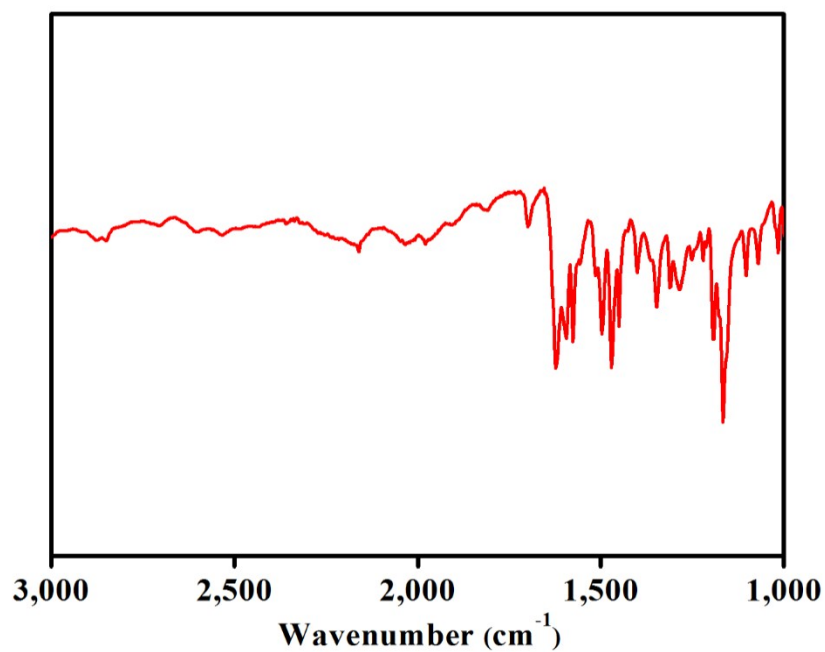

**Fig. S10** The ATR-FTIR spectrum of MC.

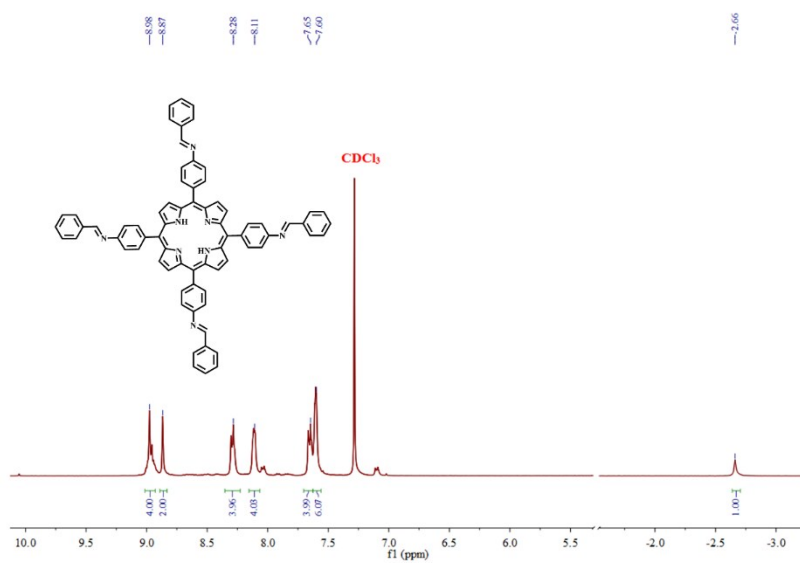

**Fig. S11** The <sup>1</sup>H NMR spectrum of MC.

## 6. The characterization of PCOF, PCOF-Fe and PCOF-Co

**Table S1. Reaction conditions screening with different solvents system for the synthesis of PCOF-1.**

| Entry                 | Solvents                               | T (°C) | Catalyst        | Crystallinity |
|-----------------------|----------------------------------------|--------|-----------------|---------------|
| <b>PCOF-1</b><br>(1)  | Dioxane/Mesitylene = 1/1               | 120    | 6 M Acetic acid | No            |
| <b>PCOF-1</b><br>(2)  | Dioxane/Mesitylene = 0.5/1.5           | 120    | 6 M Acetic acid | No            |
| <b>PCOF-1</b><br>(3)  | Dioxane/Mesitylene = 1.5/0.5           | 120    | 6 M Acetic acid | No            |
| <b>PCOF-1</b><br>(4)  | o-dichlorobenzene/n-butanol = 1/1      | 120    | 6 M Acetic acid | Low           |
| <b>PCOF-1</b><br>(5)  | o-dichlorobenzene/n-butanol = 0.5/1.5  | 120    | 6 M Acetic acid | No            |
| <b>PCOF-1</b><br>(6)  | o-dichlorobenzene/n-butanol = 1.5/0.5  | 120    | 6 M Acetic acid | Moderate      |
| <b>PCOF-1</b><br>(7)  | o-dichlorobenzene/n-butanol = 1.5/0.5  | 150    | 6 M Acetic acid | Low           |
| <b>PCOF-1</b><br>(8)  | o-dichlorobenzene/n-butanol = 1.5/0.5  | 120    | 3 M Acetic acid | Low           |
| <b>PCOF-1</b><br>(9)  | o-dichlorobenzene/Mesitylene = 1/1     | 120    | 6 M Acetic acid | Moderate      |
| <b>PCOF-1</b><br>(10) | o-dichlorobenzene/Mesitylene = 1.5/0.5 | 120    | 6 M Acetic acid | High          |
| <b>PCOF-1</b><br>(11) | o-dichlorobenzene/Mesitylene = 1.7/0.3 | 120    | 6 M Acetic acid | High          |

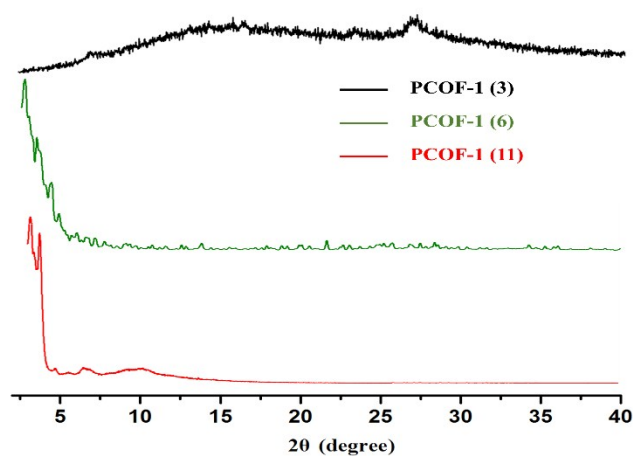

**Fig. S11** PXRD of different samples of **PCOF-1** (optimization entries 3, 6 and 11 in Table S1).

**Table S2. Reaction conditions screening with different solvents system for the synthesis of PCOF-2.**

| Entry                 | Solvents                               | T (°C) | Catalyst        | Crystallinity |
|-----------------------|----------------------------------------|--------|-----------------|---------------|
| <b>PCOF-2</b><br>(1)  | Dioxane/Mesitylene = 1/1               | 120    | 6 M Acetic acid | No            |
| <b>PCOF-2</b><br>(2)  | Dioxane/Mesitylene = 0.5/1.5           | 120    | 6 M Acetic acid | No            |
| <b>PCOF-2</b><br>(3)  | Dioxane/Mesitylene = 1.5/0.5           | 120    | 6 M Acetic acid | No            |
| <b>PCOF-2</b><br>(4)  | o-dichlorobenzene/n-butanol = 1/1      | 120    | 6 M Acetic acid | No            |
| <b>PCOF-2</b><br>(5)  | o-dichlorobenzene/n-butanol = 0.5/1.5  | 120    | 6 M Acetic acid | No            |
| <b>PCOF-2</b><br>(6)  | o-dichlorobenzene/n-butanol = 1.5/0.5  | 120    | 6 M Acetic acid | Moderate      |
| <b>PCOF-2</b><br>(7)  | o-dichlorobenzene/n-butanol = 1.5/0.5  | 150    | 6 M Acetic acid | Low           |
| <b>PCOF-2</b><br>(8)  | o-dichlorobenzene/n-butanol = 1.5/0.5  | 120    | 3 M Acetic acid | No            |
| <b>PCOF-2</b><br>(9)  | o-dichlorobenzene/Mesitylene = 1/1     | 120    | 6 M Acetic acid | Low           |
| <b>PCOF-2</b><br>(10) | o-dichlorobenzene/Mesitylene = 1.5/0.5 | 120    | 6 M Acetic acid | Moderate      |
| <b>PCOF-2</b><br>(11) | o-dichlorobenzene/Mesitylene = 1.7/0.3 | 120    | 6 M Acetic acid | High          |

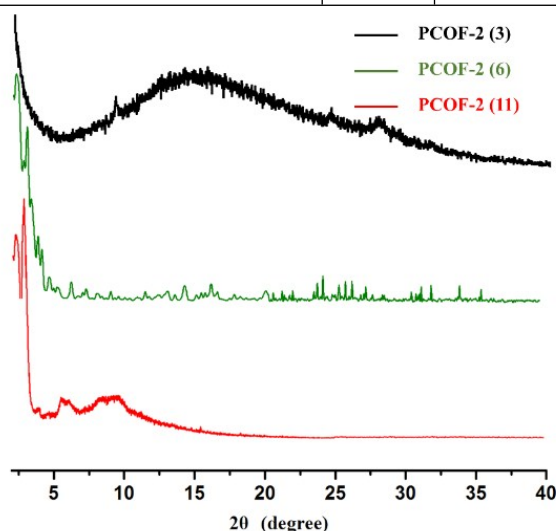

**Fig. S12** PXRD of different samples of **PCOF-2** (optimization entries 3, 6 and 11 in Table S2).

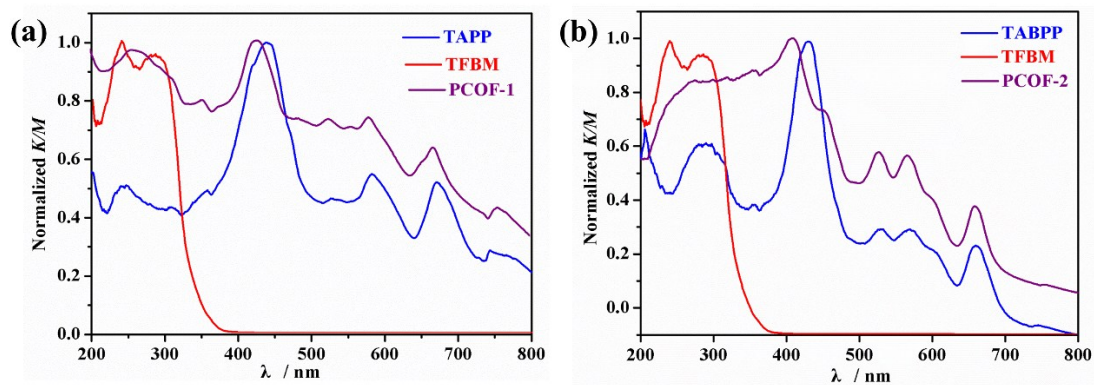

**Fig. S13** Kubelka–Munk function for diffuse reflectance spectra of (a) TAPP, TFBM and **PCOF-1**; (b) TABPP, TFBM and **PCOF-2**. Spectra are normalized to global absorption maximum.

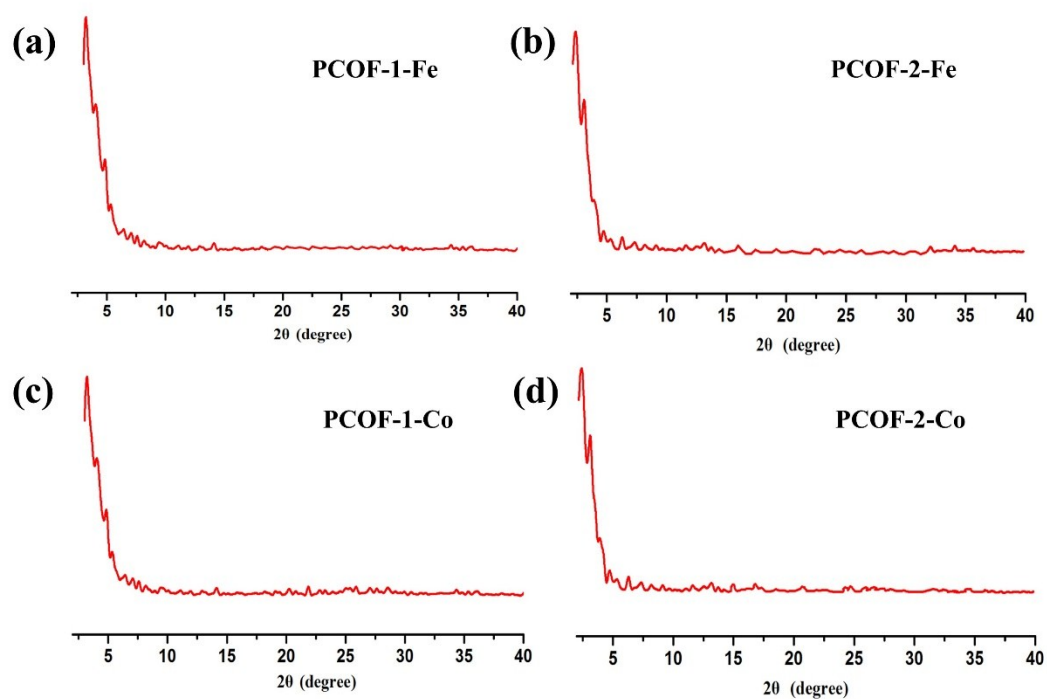

**Fig. S14** PXRD patterns of (a) **PCOF-1-Fe**, (b) **PCOF-2-Fe**, (c) **PCOF-1-Co** and (d) **PCOF-2-Co**.

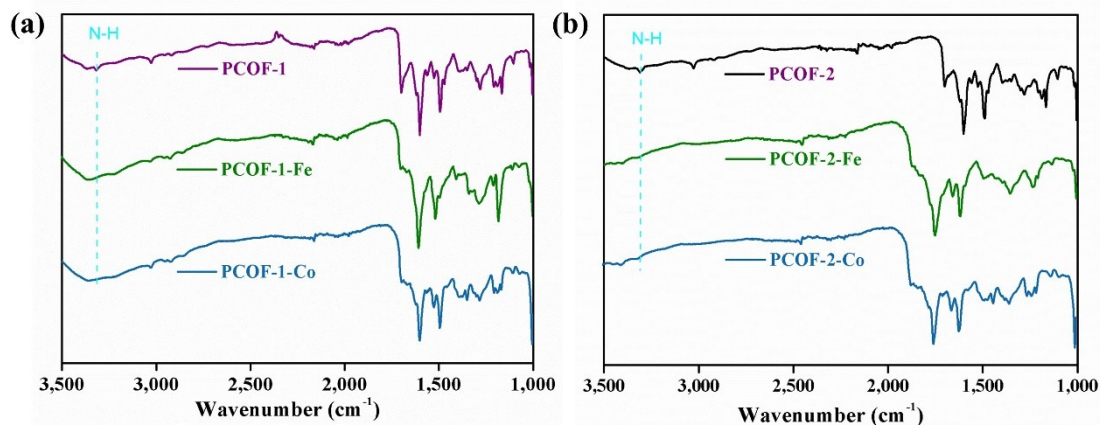

**Fig. S15** The ATR-FTIR spectrum of (a) **PCOF-1**, **PCOF-1-Fe** and **PCOF-1-Co**; (b) **PCOF-2**, **PCOF-2-Fe** and **PCOF-2-Co**.

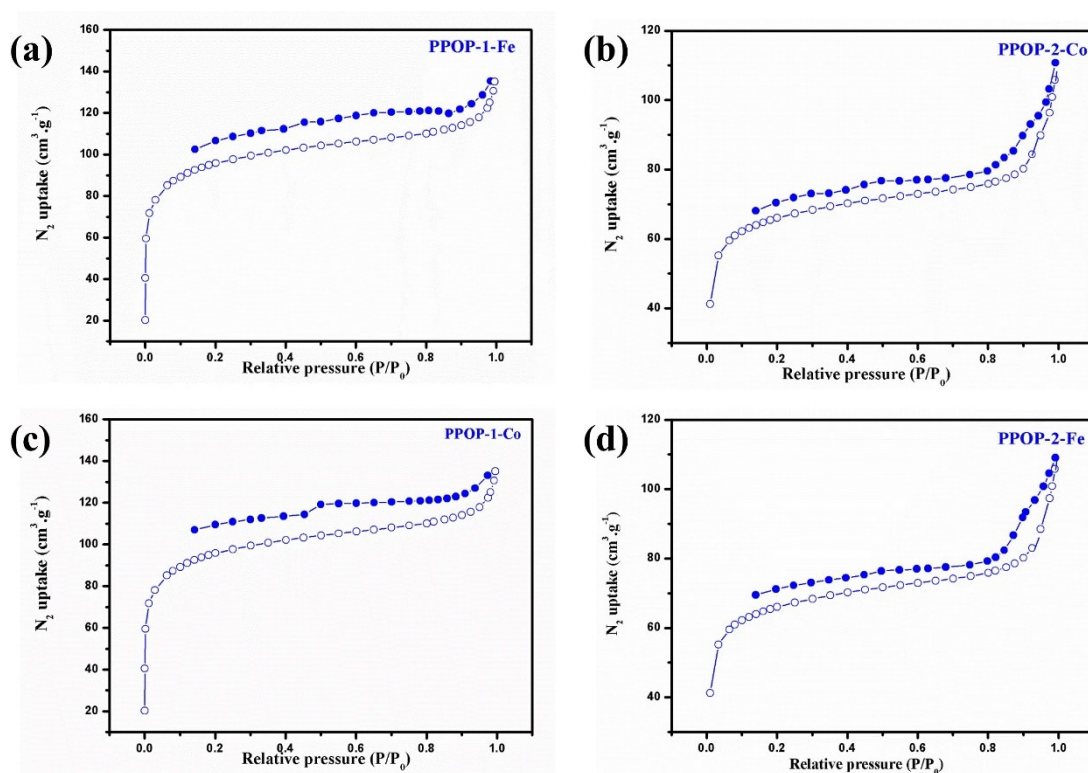

**Fig. S16**  $N_2$  adsorption/desorption isotherms of (a) **PCOF-1-Fe**, (b) **PCOF-2-Co**, (c) **PCOF-1-Co** and (d) **PCOF-2-Fe**.



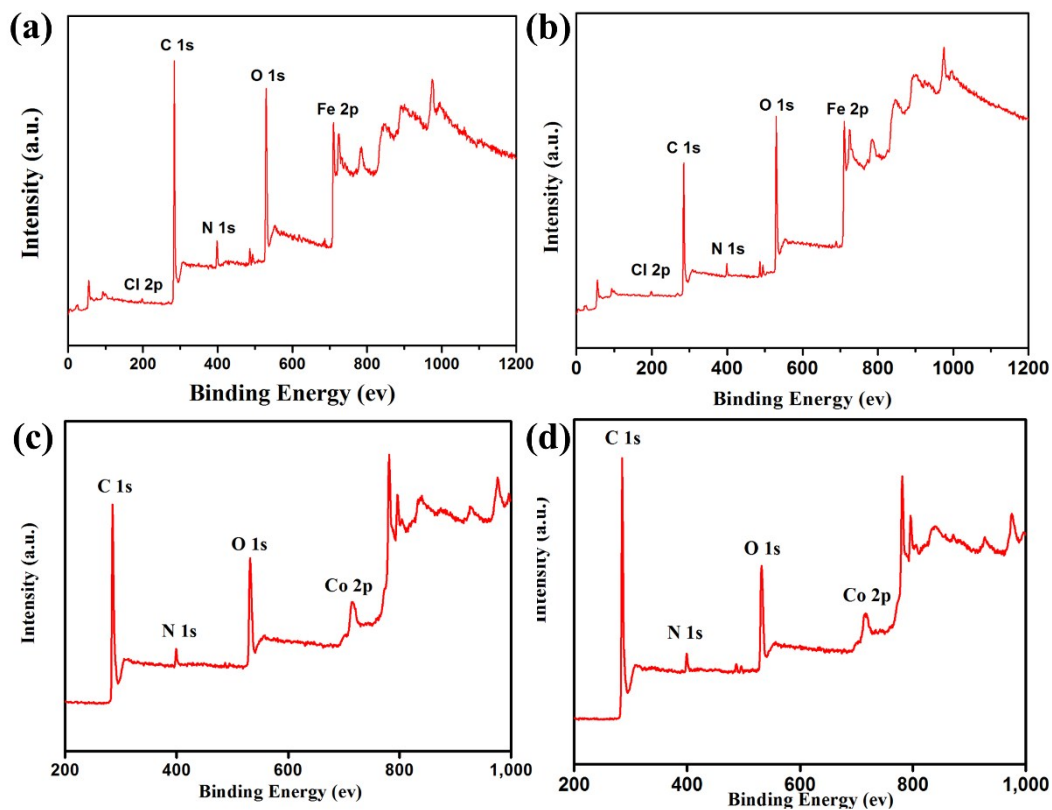

**Fig. S17** XPS survey scan of (a) PCOF-1-Fe and (b) PCOF-2-Fe (c) PCOF-1-Co and (d) PCOF-2-Co.

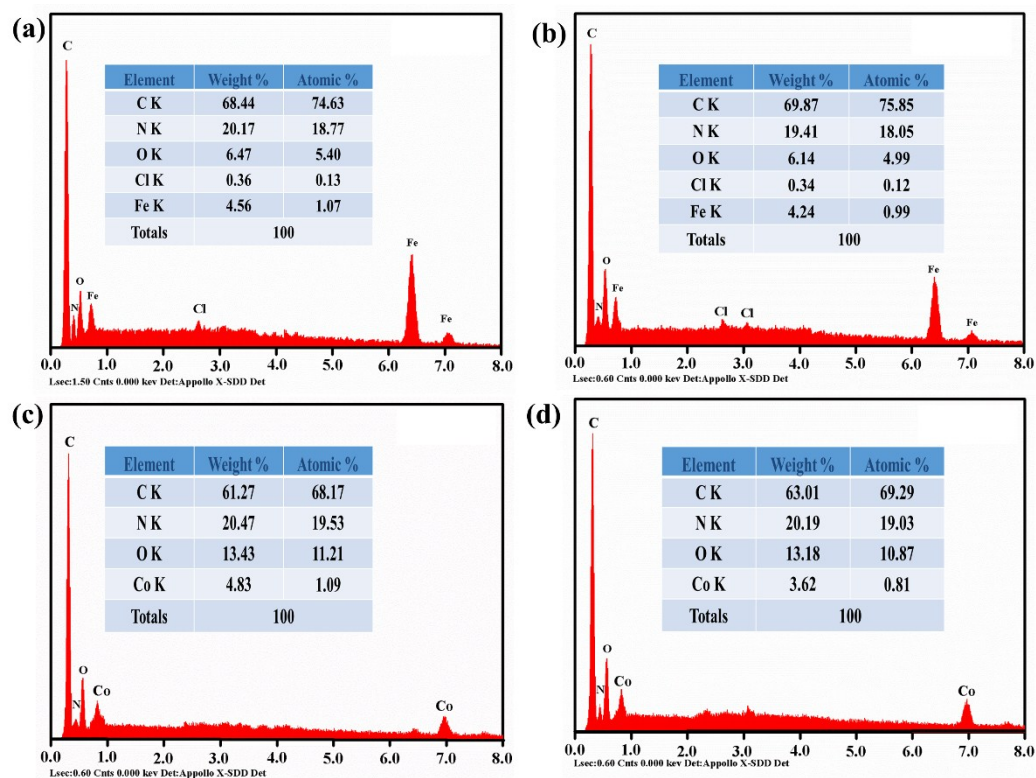

**Fig. S18** Energy dispersive X-ray Spectroscopy (EDX) spectrum of (a) PCOF-1-Fe, (b) PCOF-2-Fe, (c) PCOF-1-Co and (d) PCOF-2-Co.

## 7. The stability of PCOF-1 and PCOF-2

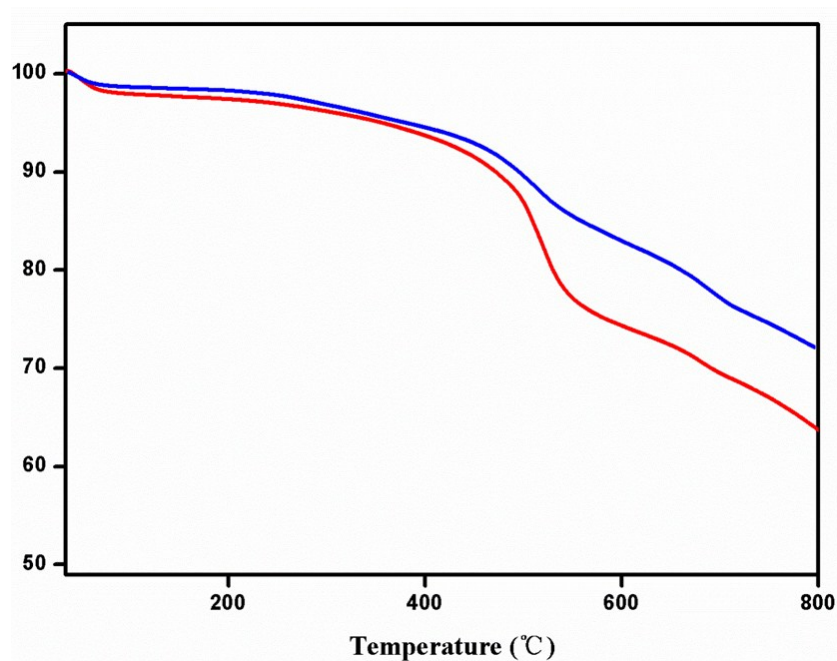

**Fig. S19** TGA profiles of **PCOF-1** (red) and **PCOF-2** (blue).

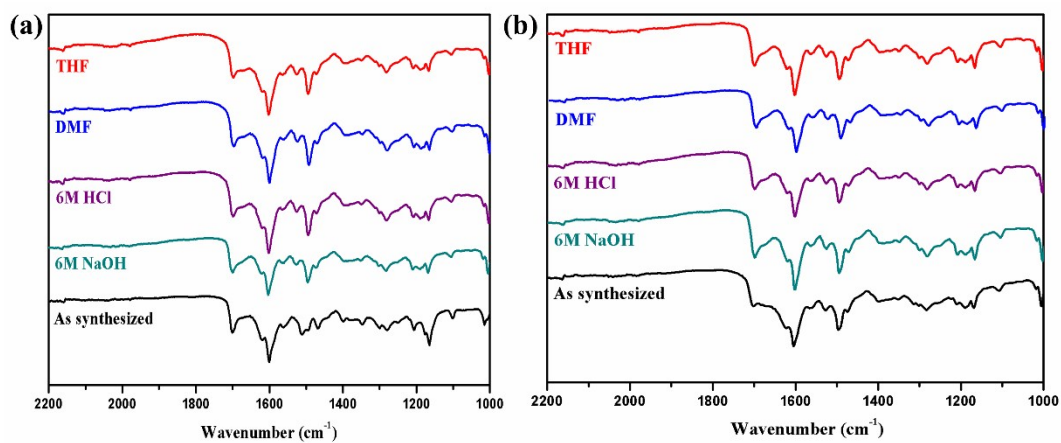

**Fig. S20** FT-IR spectra of (a) **PCOF-1** and (b) **PCOF-2** after treatment for 7 days in THF (red), DMF (blue), 6 M HCl solution (purple) and 6 M NaOH solution (green).

---

## 8. Biomimetic catalysis characterization.

The mixture of the substrates with specific concentrations and H<sub>2</sub>O<sub>2</sub> in 3 mL of buffer solution was catalyzed by **PCOF-1-Fe**, **PCOF-2-Fe** and Fe-TAPP. The products were confirmed by scanning the UV-vis absorbance on spectrophotometer and the concentrations of products were calculated by their molar extinction coefficients at respective wavelengths ( for ABTS•<sup>+</sup>, the peroxidized product of ABTS, is 12000 M<sup>-1</sup>cm<sup>-1</sup> at 660 nm; for oxidized state 3,3,5,5-tetramethylbenzidine is 35800 M<sup>-1</sup> cm<sup>-1</sup> at 650 nm).

For kinetic study of the single substrate reaction, we propose the reactions catalyzed by **PCOF-1-Fe**, **PCOF-2-Fe** and Fe-TAPP follow widely-accepted ping-pong mechanism.<sup>9</sup>

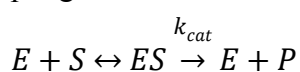

Where E is the catalyst and S is the substrate. ES is the state of intermediate. P is the product, and  $k_{cat}$  is the Michaelis-Menten constant. The initial reaction rates were calculated by monitoring above wavelengths with half a minute intervals in kinetic mode. According to typical enzymatic reaction kinetic assay, the reaction rates were fitted to Michaelis-Menten equation:

$$v = v_{max} \times \frac{[S]}{(K_m + [S])}$$

where  $v$  is the initial reaction rate,  $v_{max}$  is the maximal reaction rate,  $[S]$  is the concentration of the substrate and  $K_m$  is the Michaelis-Menten constant. Lineweaver–Burk plot was employed for illustrating kinetic data and calculate the parameters by taking the reciprocal of both sides of the Michael-Menten equation.

$$\frac{1}{v} = \frac{K_m}{v_{max}[S]} + \frac{1}{v_{max}}$$

The oxidation of 2,2'-azinodi(3-ethylbenzothiazoline)-6-sulfonate (ABTS) to ABTS•<sup>+</sup> (660 nm) we referred to the previous work,<sup>10</sup> a series of concentrations of substrate varied from 2 mM to 10 mM along with a fixed amount of **PCOF-1-Fe**, **PCOF-2-Fe** and Fe-TAPP catalyst (ca. 40 ug) and hydrogen peroxide concentration (40 mM) in 3 mL of 4-(2-hydroxyethyl)-1-piperazineethane- sulfonic acid (HEPES) buffer. Kinetic measurements were carried out in time-course mode by monitoring the absorbance change at 660 nm for ABTS•<sup>+</sup> on a Jasco V550 UV-vis spectrophotometer with 500 rpm at 25 °C. The Michaelis–Menten constant was calculated using the Michaelis–Menten curve fit. Meanwhile, we recorded the color change for the whole process, which changed from colorless to dark green in just 2 minutes.

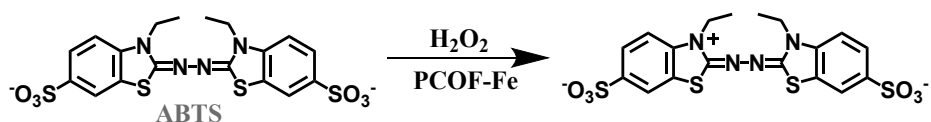

For oxidation of 3,3',5,5'-tetramethylbenzidine, acid aqueous solution (pH = 3) was selected due to the favorable reaction condition.<sup>11</sup> The concentrations of substrate varied from 0.2 mM to 2.0 mM along with a fixed amount of **PCOF-1-Fe**, **PCOF-2-Fe** and Fe-TAPP catalyst (ca. 10 ug) and hydrogen peroxide concentration of 40 mM.

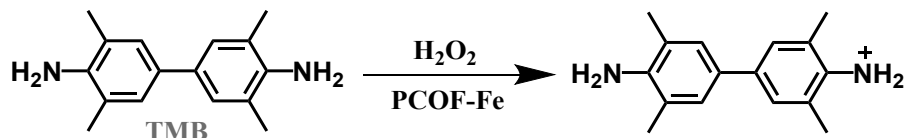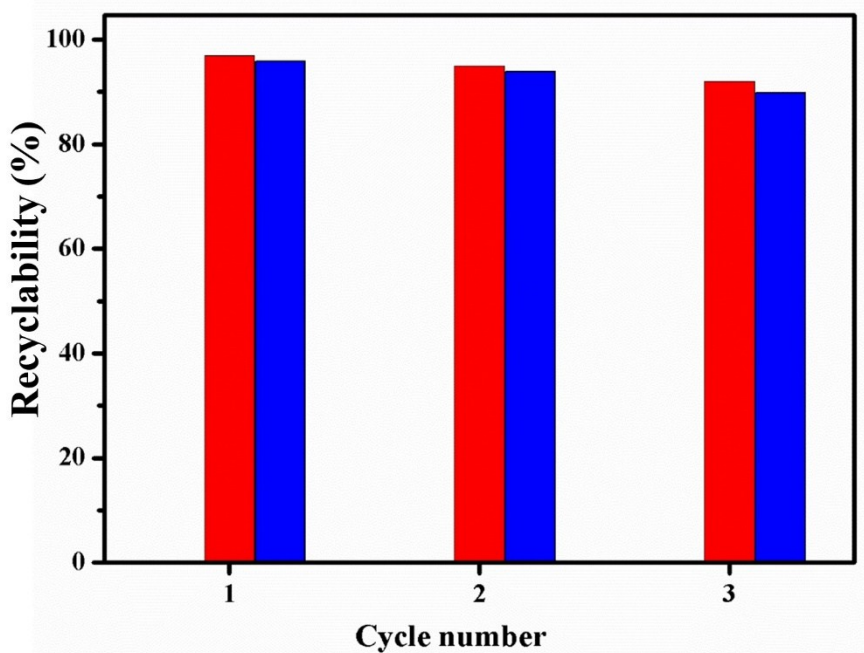

**Fig. S21** Yield of catalytic recyclability studies for the oxidation of ABTS by **PCOF-1-Fe** (red) and **PCOF-2-Fe** (blue).

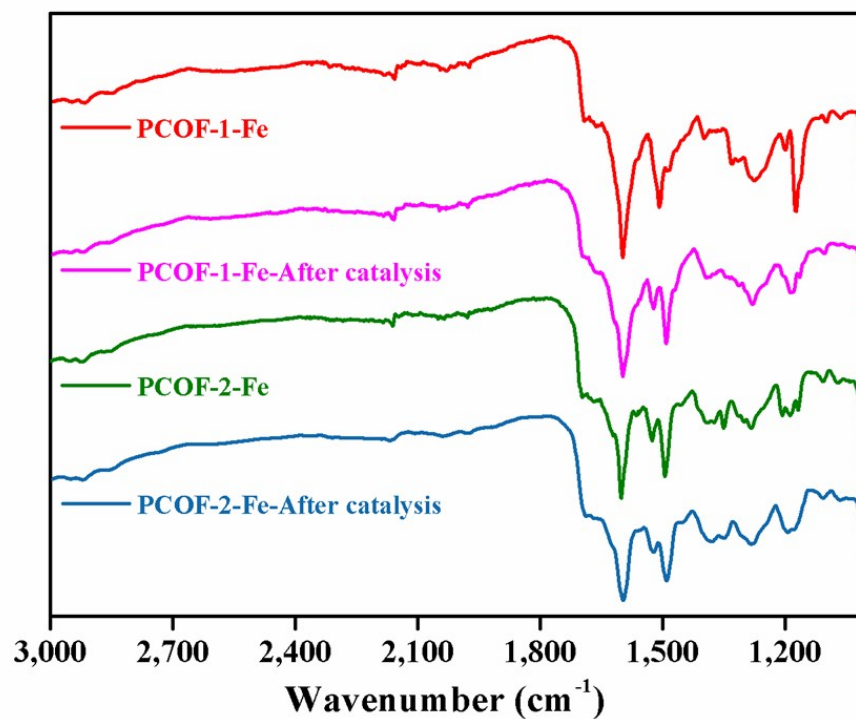

**Fig. S22** The FT-IR spectra of PCOF-Fe before and after catalysis.

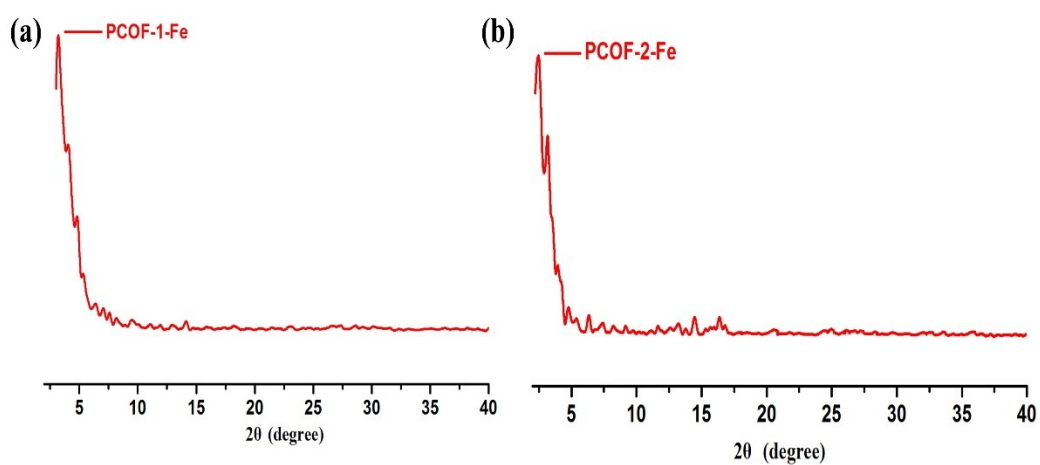

**Fig. S23** PXRD patterns of (a) PCOF-1-Fe, (b) PCOF-2-Fe after catalysis.

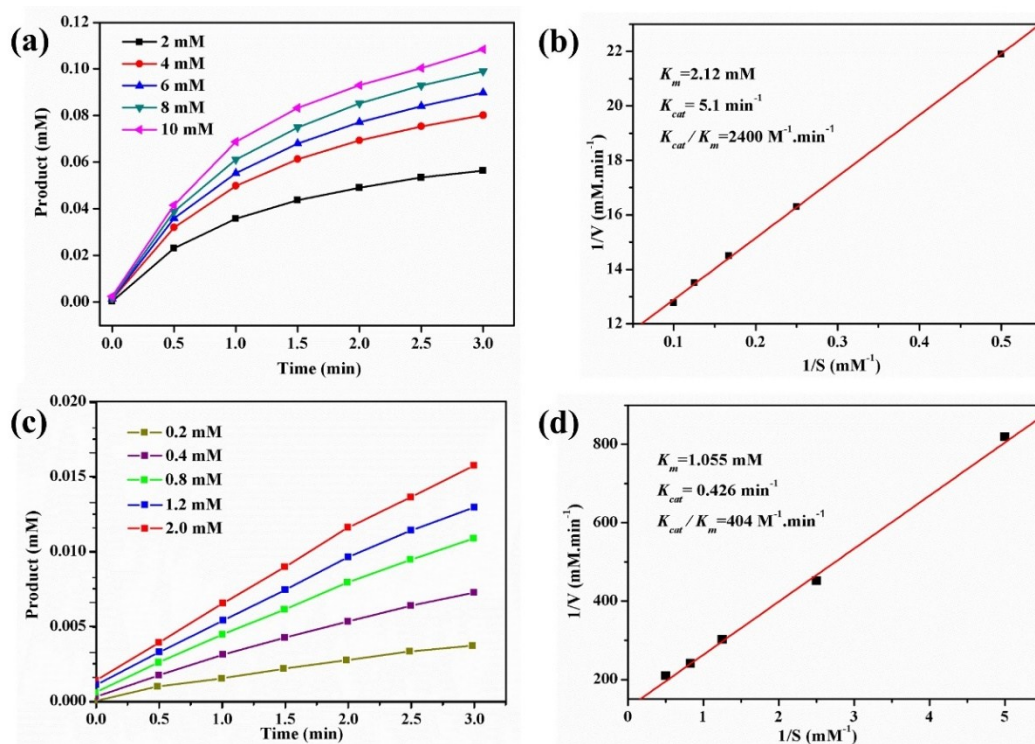

**Fig. S24** (a) The fitting curves of the initial ABTS oxidation profiles at marked concentrations by Fe-TAPP; (b) The Lineweaver-Burk plots of ABTS oxidation catalyzed by Fe-TAPP; (c) The fitting curves of the initial TMB oxidation profiles at marked concentrations by Fe-TAPP; (d) The Lineweaver-Burk plots of TMB oxidation catalyzed by Fe-TAPP.



---

## 9. Electrochemical characterization

Electrochemical measurements of all samples (TAPP-Co, TABPP-Co, **PCOF-1-Co** and **PCOF-2-Co**) were performed under the same test conditions.<sup>12</sup> Catalytic behavior of the working electrode was measured by a CHI 760E electrochemical workstation. Electrochemical activities of **PCOF-Co** catalyst toward OER was investigated in 1 (M) KOH solution. The electrochemical catalytic activity of **PCOF-Co** was extensively studied using a three-electrode system with glassy carbon (0.07 cm<sup>2</sup>) as the working electrode, a platinum plate and Hg/HgO were used as the counter electrode and reference electrode respectively. Before collecting the data, the catalysts should be run for several times. Typically, 9 mg electrocatalyst powder were spread in 1 mL of 2:3 (V/V) DI water/EtOH mix solvent with 50  $\mu$ L Nafion solution. The mixture was sonicated in an ultrasonic water bath for about 1 hour to form a homogeneous catalyst ink. And the 5  $\mu$ L of the ink was attached on the glassy carbon, the mass loading is about 0.643 mg cm<sup>-2</sup>, and dried in oven for 12 h. Linear sweep voltammogram (LSV) was obtained at the scan speed of 20 mV/s in 1 M KOH. Chronopotentiometric measurements were measured for the stability research at the current density of 10 mA cm<sup>-2</sup> over 20 hours. Electrochemical impedance spectroscopy (EIS) was registered with 5 mV amplitude at 1.65V versus RHE, and the range is between 0.1 Hz and 10<sup>5</sup> Hz. The reversible hydrogen electrode potential was registered according to the equation:  $E_{RHE} = E_{Hg/Hgo} + 0.098 + 0.0591 \times pH$ . The overpotential was computed as:  $\eta = E_{RHE} - 1.23$  V.

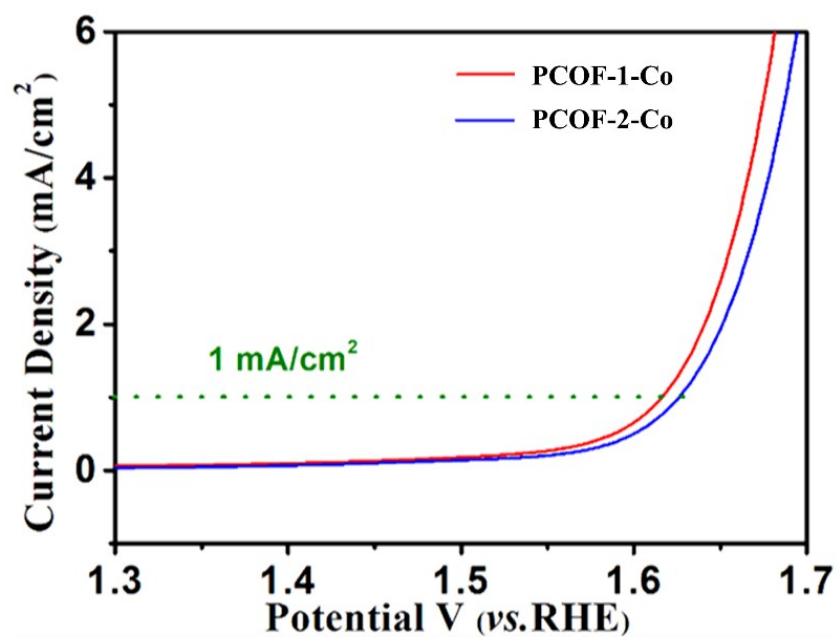

**Fig. S25** LSV curves of **PCOF-1-Co** and **PCOF-2-Co** in 1.0 M KOH at 20 mV/s with *iR* compensation.

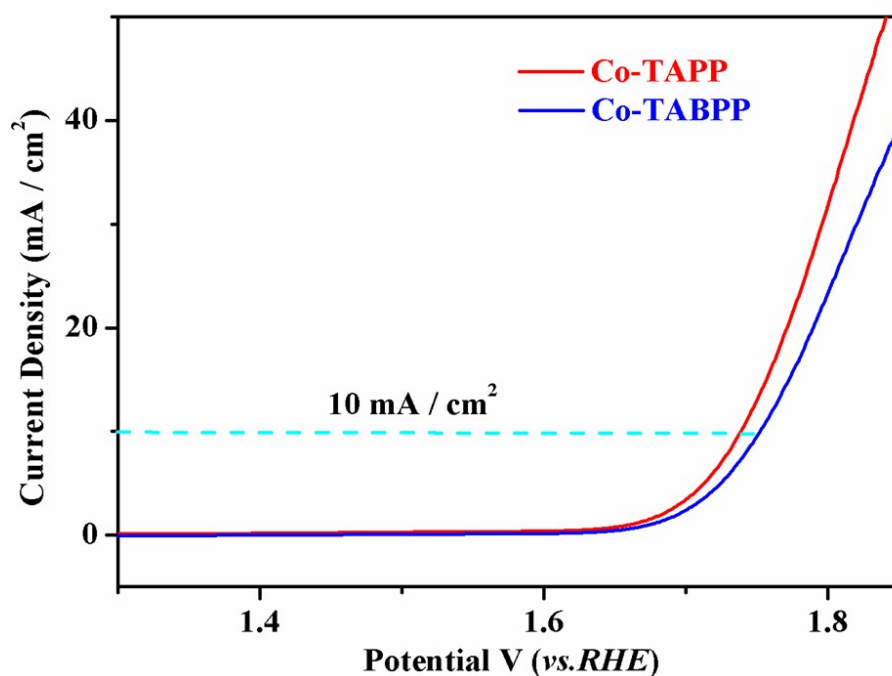

**Fig. S26** LSV curves of **Co-TAPP** and **Co-TABPP** in 1.0 M KOH at 20 mV/s with *iR* compensation.



## 10. Crystallographic data for TFBM and MC

**Table S3 Summary of crystallographic data for TFBM.**

| TFBM                                                                                               |                                                |
|----------------------------------------------------------------------------------------------------|------------------------------------------------|
| Formula                                                                                            | C <sub>46</sub> H <sub>38</sub> O <sub>4</sub> |
| Fw                                                                                                 | 654.76                                         |
| <i>T</i> (K)                                                                                       | 173                                            |
| $\lambda$ (Å)                                                                                      | 0.71073                                        |
| Crystal system                                                                                     | tetragonal                                     |
| Space group                                                                                        | <i>P4<sub>3</sub>2<sub>1</sub>2</i> (No.96)    |
| <i>a</i> (Å)                                                                                       | 17.0286(10)                                    |
| <i>b</i> (Å)                                                                                       | 17.0286(10)                                    |
| <i>c</i> (Å)                                                                                       | 12.7776(15)                                    |
| $\alpha$ (°)                                                                                       | 90                                             |
| $\beta$ (°)                                                                                        | 90                                             |
| $\gamma$ (°)                                                                                       | 90                                             |
| <i>V</i> (Å <sup>3</sup> )                                                                         | 3705.2(6)                                      |
| <i>Z</i>                                                                                           | 4                                              |
| D <sub>calc</sub> (g/cm <sup>3</sup> )                                                             | 1.174                                          |
| $\mu$ (mm <sup>-1</sup> )                                                                          | 0.074                                          |
| <i>F</i> (000)                                                                                     | 1384                                           |
| $\theta$ (°)                                                                                       | 2.9, 23.2                                      |
| Index ranges                                                                                       | -18 ≤ <i>h</i> ≤ 13                            |
|                                                                                                    | -18 ≤ <i>k</i> ≤ 18                            |
|                                                                                                    | -12 ≤ <i>l</i> ≤ 14                            |
| Reflections collected                                                                              | 7883                                           |
| GOF (F <sup>2</sup> )                                                                              | 1.115                                          |
| <i>R</i> <sub>I</sub> <sup><i>a</i></sup> , <i>wR</i> <sub>2</sub> <sup><i>b</i></sup> (I > 2σ(I)) | 0.0979, 0.2256                                 |
| <i>R</i> <sub>I</sub> <sup><i>a</i></sup> , <i>wR</i> <sub>2</sub> <sup><i>b</i></sup> (all data)  | 0.1928, 0.3318                                 |

$$R_I^a = \Sigma ||F_o| - |F_c|| / \Sigma F_o, \quad wR_2^b = [\Sigma w(F_o^2 - F_c^2)^2 / \Sigma w(F_o^2)]^{1/2}$$

---

**Table S4. Selected bond lengths [Å] and angles [°] for TFBM.**

| TFBM   |           |           |           |
|--------|-----------|-----------|-----------|
| C1-C2  | 1.380(13) | C1-C2_a   | 1.380(13) |
| C1-C5  | 1.508(13) | C7-C22Z   | 1.483(17) |
| C2-C3  | 1.412(14) | C7-C22A   | 1.49(3)   |
| S2-C23 | 1.6756(5) | C8-C26    | 1.551(14) |
| C2-C9  | 1.526(14) | C10-C15   | 1.388(18) |
| C3-C4  | 1.384(14) | C10-C16   | 1.48(2)   |
| C3-C13 | 1.499(14) | C12-C13   | 1.395(15) |
| C4-C17 | 1.539(14) | C13-C14   | 1.383(16) |
| C5-C6  | 1.399(12) | C14-C15   | 1.396(17) |
| C6-C7  | 1.443(14) | C19A-C20A | 1.37(8)   |
| C6-C18 | 1.510(14) | C19A-C24A | 1.37(8)   |
| C7-C8  | 1.371(12) | C19A-C25A | 1.48(7)   |
| C5-C6  | 1.399(12) | C19Z-C25Z | 1.49(2)   |

---

**Table S5 Summary of crystallographic data for MC.**

---

| MC                                                                                                 |                                                |
|----------------------------------------------------------------------------------------------------|------------------------------------------------|
| Formula                                                                                            | C <sub>72</sub> H <sub>50</sub> N <sub>8</sub> |
| Fw                                                                                                 | 1027.20                                        |
| <i>T</i> (K)                                                                                       | 173                                            |
| $\lambda$ (Å)                                                                                      | 0.71073                                        |
| Crystal system                                                                                     | triclinic                                      |
| Space group                                                                                        | <i>P</i> -1 (No. 2)                            |
| <i>a</i> (Å)                                                                                       | 11.0971 (7)                                    |
| <i>b</i> (Å)                                                                                       | 17.1236 (11)                                   |
| <i>c</i> (Å)                                                                                       | 18.6175 (11)                                   |
| $\alpha$ (°)                                                                                       | 94.671 (2)                                     |
| $\beta$ (°)                                                                                        | 102.879 (2)                                    |
| $\gamma$ (°)                                                                                       | 94.472 (2)                                     |
| <i>V</i> (Å <sup>3</sup> )                                                                         | 3420.4 (4)                                     |
| <i>Z</i>                                                                                           | 2                                              |
| D <sub>calc</sub> (g/cm <sup>3</sup> )                                                             | 0.997                                          |
| $\mu$ (mm <sup>-1</sup> )                                                                          | 0.059                                          |
| <i>F</i> (000)                                                                                     | 1076                                           |
| $\theta$ (°)                                                                                       | 2.9, 25.0                                      |
| Index ranges                                                                                       | -13 ≤ <i>h</i> ≤ 13                            |
|                                                                                                    | -20 ≤ <i>k</i> ≤ 18                            |
|                                                                                                    | -22 ≤ <i>l</i> ≤ 22                            |
| Reflections collected                                                                              | 5958                                           |
| GOF (F <sup>2</sup> )                                                                              | 1.029                                          |
| <i>R</i> <sub>I</sub> <sup><i>a</i></sup> , <i>wR</i> <sub>2</sub> <sup><i>b</i></sup> (I > 2σ(I)) | 0.0797, 0.2135                                 |
| <i>R</i> <sub>I</sub> <sup><i>a</i></sup> , <i>wR</i> <sub>2</sub> <sup><i>b</i></sup> (all data)  | 0.1826, 0.3234                                 |

---

$$R_I^a = \Sigma ||F_o| - |F_c|| / \Sigma F_o, \quad wR_2^b = [\Sigma w(F_o^2 - F_c^2)^2 / \Sigma w(F_o^2)]^{1/2}$$

The formula and these parameters do not include solvent.

---

**Table S6. Selected bond lengths [Å] and angles [°] for MC**

| MC        |          |           |          |
|-----------|----------|-----------|----------|
| C1A-C2A   | 1.428(5) | C25A-C26A | 1.396(6) |
| C1A-C10A  | 1.397(5) | C26A-C27  | 1.364(7) |
| C2A-C3A   | 1.348(6) | C28A-C29A | 1.392(5) |
| C3A-C4A   | 1.430(5) | C30A-C31A | 1.493(6) |
| C4A-C5A   | 1.406(5) | C31A-C36A | 1.374(8) |
| C4A-C5A   | 1.406(5) | C31A-C36A | 1.374(8) |
| C5A-C6A   | 1.405(5) | C31A-C32A | 1.383(8) |
| C5A-C11A  | 1.487(5) | C32A-C33A | 1.381(8) |
| C6A-C7A   | 1.445(5) | C33A-C34A | 1.371(8) |
| C7A-C8A   | 1.340(5) | C34A-C35A | 1.362(9) |
| C8A-C9A   | 1.446(5) | C35A-C36A | 1.394(8) |
| C9A-C10A  | 1.399(5) | N1B-C4B   | 1.369(5) |
| C10A-C24A | 1.500(5) | N1B-C1B   | 1.381(4) |
| C11A-C12A | 1.381(6) | N2B-C6B   | 1.379(5) |
| C12A-C13A | 1.385(6) | N2B-C9B   | 1.383(4) |
| C13A-C14A | 1.367(6) | N3B-C14B  | 1.424(5) |
| C15A-C16A | 1.388(5) | N3B-C17B  | 1.244(6) |
| C17A-C18A | 1.470(6) | N4B-C27B  | 1.424(5) |

---

## 11.The fractional atomic coordinates of PCOF-1 and PCOF-2

**Table S7. PCOF-1 staggered stacking**

| Space group $Pmc_{21}$                                                                                                               |         |          |         |
|--------------------------------------------------------------------------------------------------------------------------------------|---------|----------|---------|
| Cell parameters $a = 50.6034 \text{ \AA}$ $b = 26.7054 \text{ \AA}$ $c = 26.6992 \text{ \AA}$ $\alpha = \beta = \gamma = 90.0^\circ$ |         |          |         |
| Atom                                                                                                                                 | $x/a$   | $y/b$    | $z/c$   |
| C1                                                                                                                                   | 0.41468 | 0.53415  | 0.65579 |
| C2                                                                                                                                   | 0.39614 | 0.5344   | 0.69452 |
| C3                                                                                                                                   | 0.08495 | 0.77901  | 0.48092 |
| C4                                                                                                                                   | 0.10311 | 0.73968  | 0.48449 |
| C5                                                                                                                                   | 0.42936 | 0.38323  | 0.18064 |
| C6                                                                                                                                   | 0.41083 | 0.38309  | 0.21942 |
| C7                                                                                                                                   | 0.07    | -0.0841  | 1.04479 |
| C8                                                                                                                                   | 0.08853 | -0.12277 | 1.04374 |
| C9                                                                                                                                   | 0.44401 | 0.57109  | 0.55882 |
| C10                                                                                                                                  | 0.45213 | 0.5739   | 0.60919 |
| C11                                                                                                                                  | 0.43149 | 0.57525  | 0.64876 |
| C12                                                                                                                                  | 0.39414 | 0.5755   | 0.72669 |
| N13                                                                                                                                  | 0.37601 | 0.57322  | 0.76781 |
| C14                                                                                                                                  | 0.58226 | 0.57088  | 0.54433 |
| C15                                                                                                                                  | 0.97883 | 0.18543  | 0.01611 |
| C16                                                                                                                                  | 0.98647 | 0.2352   | 0.01638 |
| C17                                                                                                                                  | 0.93165 | 0.20977  | 0.02142 |
| C18                                                                                                                                  | 0.89517 | 0.28874  | 0.02868 |
| N19                                                                                                                                  | 0.87802 | 0.33116  | 0.03273 |
| C20                                                                                                                                  | 0.04785 | 0.17028  | 0.01692 |
| C21                                                                                                                                  | 0.41566 | 0.60153  | 0.37884 |
| C22                                                                                                                                  | 0.3974  | 0.60018  | 0.33957 |
| C23                                                                                                                                  | 0.08576 | 1.0548   | 0.46435 |
| C24                                                                                                                                  | 0.42871 | 0.48361  | 0.85984 |

---

|     |         |          |         |
|-----|---------|----------|---------|
| C25 | 0.41048 | 0.48489  | 0.82063 |
| C26 | 0.0703  | 0.2378   | 0.06562 |
| C27 | 0.08844 | 0.27702  | 0.06916 |
| C28 | 0.44401 | 0.566    | 0.47874 |
| C29 | 0.45214 | 0.56206  | 0.42849 |
| C30 | 0.43153 | 0.55971  | 0.38895 |
| C31 | 0.39483 | 0.55692  | 0.31004 |
| N32 | 0.37776 | 0.55539  | 0.26732 |
| C33 | 0.58226 | 0.56746  | 0.49309 |
| C34 | 0.97882 | -0.02526 | 1.00268 |
| C35 | 0.98647 | -0.07465 | 0.99654 |
| C36 | 0.93158 | -0.05003 | 1.00501 |
| C37 | 0.89421 | -0.12791 | 1.00283 |
| N38 | 0.87583 | 0.83139  | 0.99981 |
| C39 | 0.04786 | -0.01033 | 1.00543 |
| N40 | 0.96023 | 0.08006  | 0.00997 |
| N41 | 0.46029 | 0.5682   | 0.51881 |
| C42 | 0.47882 | 0.57445  | 0.62433 |
| C43 | 0.48647 | 0.57467  | 0.6741  |
| C44 | 0.47882 | 0.56062  | 0.41339 |
| C45 | 0.48647 | 0.55836  | 0.36367 |
| C46 | 0.05601 | 0.88003  | 0.51451 |
| C47 | 0.08222 | 0.89461  | 0.51694 |
| C48 | 0.05601 | 0.96009  | 0.50941 |
| C49 | 0.08222 | 0.94588  | 0.51369 |
| C50 | 0.65299 | 0.41053  | 0.70763 |
| C51 | 0.65163 | 0.45256  | 0.67627 |
| C52 | 0.66847 | 0.36952  | 0.69348 |
| C53 | 0.68231 | 0.37028  | 0.64814 |
| C54 | 0.66539 | 0.45335  | 0.63095 |

---

|     |         |         |         |
|-----|---------|---------|---------|
| C55 | 0.68068 | 0.41209 | 0.61656 |
| C56 | 0.63717 | 0.40764 | 0.75358 |
| C57 | 0.69411 | 0.41187 | 0.56734 |
| C58 | 0.72188 | 0.41453 | 0.5646  |
| C59 | 0.73463 | 0.41431 | 0.51765 |
| C60 | 0.7196  | 0.41113 | 0.47329 |
| C61 | 0.69179 | 0.4081  | 0.47577 |
| C62 | 0.6791  | 0.40876 | 0.52289 |
| C63 | 0.76398 | 0.41711 | 0.5151  |
| C64 | 0.7766  | 0.46405 | 0.51149 |
| C65 | 0.80443 | 0.46698 | 0.51122 |
| C66 | 0.81957 | 0.42266 | 0.51419 |
| C67 | 0.807   | 0.37561 | 0.51795 |
| C68 | 0.77917 | 0.37295 | 0.51816 |
| C69 | 0.81785 | 0.51621 | 0.50881 |
| C70 | 0.83302 | 0.53238 | 0.54952 |
| C71 | 0.84779 | 0.57973 | 0.54666 |
| C72 | 0.84644 | 0.60846 | 0.50312 |
| C73 | 0.82987 | 0.59074 | 0.4613  |
| C74 | 0.81625 | 0.54542 | 0.46531 |
| C75 | 0.86255 | 0.65373 | 0.49711 |
| C76 | 0.67591 | 0.40347 | 0.42937 |
| C77 | 0.67476 | 0.44306 | 0.39495 |
| C78 | 0.65889 | 0.43917 | 0.35224 |
| C79 | 0.64409 | 0.3956  | 0.34361 |
| C80 | 0.6454  | 0.35603 | 0.37777 |
| C81 | 0.66123 | 0.35989 | 0.42043 |
| C82 | 0.62627 | 0.39121 | 0.30055 |
| C83 | 0.82309 | 0.32953 | 0.52269 |
| C84 | 0.82333 | 0.29374 | 0.48428 |

---

|      |         |         |         |
|------|---------|---------|---------|
| C85  | 0.83954 | 0.25146 | 0.4881  |
| C86  | 0.85558 | 0.24469 | 0.5304  |
| C87  | 0.85513 | 0.28018 | 0.56886 |
| C88  | 0.83898 | 0.3224  | 0.56506 |
| C89  | 0.87375 | 0.20219 | 0.53467 |
| C90  | 0.73795 | 0.41859 | 0.6117  |
| C91  | 0.64948 | 0.40621 | 0.52579 |
| C92  | 0.73335 | 0.40963 | 0.42351 |
| C93  | 0.76561 | 0.3232  | 0.52307 |
| C94  | 0.76032 | 0.51099 | 0.50951 |
| C95  | 0.84919 | 0.42543 | 0.51138 |
| C96  | 1.10434 | 0.90642 | 0.96332 |
| N97  | 0.5     | 0.5622  | 0.44425 |
| N98  | 0.5     | 0.57409 | 0.59343 |
| N99  | 0.      | 0.84546 | 0.51564 |
| N100 | 0       | 0.99457 | 0.50618 |



**Table S8. PCOF-2 staggered stacking**

| Space group $Pmc_{21}$                                                                                                               |         |          |          |
|--------------------------------------------------------------------------------------------------------------------------------------|---------|----------|----------|
| Cell parameters $a = 61.6464 \text{ \AA}$ $b = 33.5150 \text{ \AA}$ $c = 33.0089 \text{ \AA}$ $\alpha = \beta = \gamma = 90.0^\circ$ |         |          |          |
| Atom                                                                                                                                 | $x/a$   | $y/b$    | $z/c$    |
| C1                                                                                                                                   | 0.37612 | 0.54715  | 0.69842  |
| C2                                                                                                                                   | 0.3609  | 0.54839  | 0.72976  |
| C3                                                                                                                                   | 0.07011 | 0.82385  | 0.46917  |
| C4                                                                                                                                   | 0.08539 | 0.79311  | 0.47174  |
| C5                                                                                                                                   | 0.39753 | 0.40265  | 0.23251  |
| C6                                                                                                                                   | 0.3823  | 0.40135  | 0.26384  |
| C7                                                                                                                                   | 0.05742 | -0.06549 | 1.02442  |
| C8                                                                                                                                   | 0.07277 | -0.0961  | 1.02414  |
| C9                                                                                                                                   | 0.45445 | 0.55877  | 0.53449  |
| C10                                                                                                                                  | 0.46076 | 0.558    | 0.57552  |
| C11                                                                                                                                  | 0.44365 | 0.56179  | 0.60716  |
| C12                                                                                                                                  | 0.36393 | 0.57391  | 0.76273  |
| N13                                                                                                                                  | 0.34877 | 0.57266  | 0.79557  |
| C14                                                                                                                                  | 0.56628 | 0.56829  | 0.52156  |
| C15                                                                                                                                  | 0.98262 | 0.14912  | -0.00221 |
| C16                                                                                                                                  | 0.98889 | 0.18877  | -0.0027  |
| C17                                                                                                                                  | 0.94385 | 0.16847  | 0.00174  |
| C18                                                                                                                                  | 0.86932 | 0.33019  | 0.01302  |
| N19                                                                                                                                  | 0.85596 | 0.36504  | 0.01545  |
| C20                                                                                                                                  | 0.03927 | 0.13702  | -0.00134 |
| C21                                                                                                                                  | 0.37829 | 0.54745  | 0.30047  |
| C22                                                                                                                                  | 0.36465 | 0.54949  | 0.2666   |
| C23                                                                                                                                  | 0.07056 | 1.04261  | 0.45937  |
| C24                                                                                                                                  | 0.40955 | 0.45439  | 0.75618  |
| C25                                                                                                                                  | 0.39597 | 0.45284  | 0.72247  |

---

|     |         |          |          |
|-----|---------|----------|----------|
| C26 | 0.05776 | 0.19154  | 0.03697  |
| C27 | 0.07302 | 0.22218  | 0.03951  |
| C28 | 0.45449 | 0.55154  | 0.46991  |
| C29 | 0.46094 | 0.54145  | 0.43024  |
| C30 | 0.40088 | 0.54578  | 0.29545  |
| C31 | 0.37353 | 0.5495   | 0.22739  |
| N32 | 0.36023 | 0.55093  | 0.19195  |
| C33 | 0.56623 | 0.56378  | 0.48019  |
| C34 | 0.98262 | -0.01901 | 0.98976  |
| C35 | 0.98889 | -0.05843 | 0.98533  |
| C36 | 0.94383 | -0.03867 | 0.99197  |
| C37 | 0.86816 | -0.19906 | 0.98844  |
| N38 | 0.85384 | 0.76737  | 0.98592  |
| C39 | 0.03928 | -0.00707 | 0.99184  |
| N40 | 0.96738 | 0.06502  | -0.00571 |
| N41 | 0.4673  | 0.54874  | 0.503    |
| C42 | 0.48258 | 0.55399  | 0.58782  |
| C43 | 0.48887 | 0.54931  | 0.6278   |
| C44 | 0.48262 | 0.53166  | 0.4208   |
| C45 | 0.48889 | 0.51459  | 0.38445  |
| C46 | 0.04595 | 0.90312  | 0.49749  |
| C47 | 0.06746 | 0.91473  | 0.49982  |
| C48 | 0.04595 | 0.96698  | 0.49447  |
| C49 | 0.06746 | 0.95561  | 0.4979   |
| C50 | 0.67217 | 0.43701  | 0.65387  |
| C51 | 0.66557 | 0.46028  | 0.62084  |
| C52 | 0.69034 | 0.41232  | 0.65014  |
| C53 | 0.70155 | 0.41024  | 0.61334  |
| C54 | 0.67693 | 0.45858  | 0.58432  |
| C55 | 0.69487 | 0.43319  | 0.58     |

---

|     |         |         |         |
|-----|---------|---------|---------|
| C56 | 0.65975 | 0.43711 | 0.69173 |
| C57 | 0.70621 | 0.42983 | 0.54025 |
| C58 | 0.72902 | 0.43368 | 0.53792 |
| C59 | 0.73972 | 0.43004 | 0.50035 |
| C60 | 0.72768 | 0.42342 | 0.46471 |
| C61 | 0.7049  | 0.41988 | 0.46648 |
| C62 | 0.69424 | 0.42261 | 0.50433 |
| C63 | 0.76383 | 0.43253 | 0.49852 |
| C64 | 0.77414 | 0.46997 | 0.4956  |
| C65 | 0.79698 | 0.47242 | 0.4956  |
| C66 | 0.80946 | 0.43716 | 0.49798 |
| C67 | 0.79919 | 0.39961 | 0.50088 |
| C68 | 0.77635 | 0.39742 | 0.5011  |
| C69 | 0.80794 | 0.51173 | 0.49398 |
| C70 | 0.8203  | 0.52448 | 0.52708 |
| C71 | 0.83216 | 0.56252 | 0.52529 |
| C72 | 0.83091 | 0.58582 | 0.49036 |
| C73 | 0.81747 | 0.57176 | 0.45629 |
| C74 | 0.80652 | 0.53537 | 0.45906 |
| C75 | 0.84357 | 0.62266 | 0.48627 |
| C76 | 0.69211 | 0.41414 | 0.4288  |
| C77 | 0.69244 | 0.44332 | 0.39838 |
| C78 | 0.67937 | 0.43925 | 0.36403 |
| C79 | 0.66577 | 0.40596 | 0.35982 |
| C80 | 0.66559 | 0.37662 | 0.3899  |
| C81 | 0.67873 | 0.38059 | 0.42417 |
| C82 | 0.6508  | 0.40233 | 0.32552 |
| C83 | 0.8124  | 0.36284 | 0.50436 |
| C84 | 0.8121  | 0.33411 | 0.4735  |
| C85 | 0.82509 | 0.30003 | 0.47647 |

---

|      |         |         |         |
|------|---------|---------|---------|
| C86  | 0.83846 | 0.29441 | 0.51038 |
| C87  | 0.83864 | 0.32295 | 0.54125 |
| C88  | 0.82568 | 0.35701 | 0.5383  |
| C89  | 0.8528  | 0.25972 | 0.5139  |
| C90  | 0.74207 | 0.44272 | 0.57522 |
| C91  | 0.67004 | 0.41765 | 0.50626 |
| C92  | 0.7393  | 0.41921 | 0.42496 |
| C93  | 0.76526 | 0.35776 | 0.5054  |
| C94  | 0.76071 | 0.50728 | 0.49364 |
| C95  | 0.83377 | 0.43948 | 0.49578 |
| C96  | 1.08593 | 0.9267  | 0.95913 |
| C97  | 0.41561 | 0.54518 | 0.33068 |
| C98  | 0.43612 | 0.56282 | 0.32751 |
| C99  | 0.40962 | 0.52682 | 0.36723 |
| C100 | 0.44483 | 0.543   | 0.39643 |
| C101 | 0.39471 | 0.57132 | 0.69961 |
| C102 | 0.41135 | 0.56852 | 0.66734 |
| C103 | 0.42905 | 0.59488 | 0.66668 |
| C104 | 0.44502 | 0.59162 | 0.63683 |
| C105 | 0.42598 | 0.53545 | 0.60767 |
| C106 | 0.40999 | 0.53881 | 0.63746 |
| C107 | 0.08715 | 0.10049 | 0.49144 |
| C108 | 0.1029  | 0.13391 | 0.49073 |
| C109 | 0.10361 | 0.16145 | 0.52275 |
| C110 | 0.11791 | 0.19371 | 0.52166 |
| C111 | 0.13131 | 0.17157 | 0.45659 |
| C112 | 0.11697 | 0.13925 | 0.45769 |
| C113 | 0.08695 | 0.76963 | 0.50689 |
| C114 | 0.10249 | 0.73595 | 0.5092  |
| C115 | 0.10374 | 0.71248 | 0.54436 |

---

|      |         |         |         |
|------|---------|---------|---------|
| C116 | 0.1177  | 0.67973 | 0.54621 |
| C117 | 0.12969 | 0.69329 | 0.47782 |
| C118 | 0.1157  | 0.7261  | 0.47599 |
| C119 | 0.54953 | 0.56198 | 0.36005 |
| C120 | 0.57582 | 0.52556 | 0.39981 |
| N121 | 0.5     | 0.54147 | 0.44364 |
| N122 | 0.5     | 0.5565  | 0.56305 |
| N123 | 0       | 0.87549 | 0.49786 |
| N124 | 0       | 0.99453 | 0.49225 |

---

## Reference

- 1 *SAINT-Plus*, version 6.02; Bruker Analytical X-ray System: Madison, WI, 1999.
- 2 G. M. Sheldrick, *SADABS An empirical absorption correction program*, Bruker Analytical X-ray Systems: Madison, WI, 1996.
- 3 G. Sheldrick, *Acta Crystallogr., Sect. C: Struct. Chem.*, 2015, **71**, 3–8.
- 4 P. van der Sluis and A. L. Spek, *Acta Crystallogr., Sect. A: Found. Crystallogr.*, 1990, **46**, 194-201.
- 5 A. Spek, *Acta Crystallogr., Sect. D: Biol. Crystallogr.*, 2009, **65**, 148-155.
- 6 J. N. Moorthy, P. Venkatakrishnan, P. Natarajan, Z. H. Lin and T. J. Chow, *J. Org. Chem.*, 2010, **75**, 2599–2609.
- 7 A. Bettelheim and B. A. White, et al., *Inorg. Chem.*, 1987, **26**, 1009–1017.
- 8 Z. D. Ding, W. Zhu, T. Li, R. Shen, Y. X. Li, Z. J. Li and Z. G. Gu, *Dalton Trans.*, 2017, **46**, 11372.
- 9 X.-S. Wang, M. Chrzanowski, D. Yuan, B. S. Sweeting and S. Ma, *Chem. Mater.*, 2014, **26**, 1639.
- 10 W. Zhu, Z. D. Ding, X. Wang, T. Li, R. Shen, Y. Li, X. H. Ren, Z. J. Li and Z. G. Gu, *Polym. Chem.*, 2017, **8**, 4327–4331.
- 11 D. Feng, Z.-Y. Gu, J.-R. Li, H.-L. Jiang, Z. Wei and H.-C. Zhou, *Angew. Chem., Int. Ed.*, 2012, **51**, 10307–10310.
- 12 H. B. Aiyappa, J. Thote, D. B. Shinde, R. Banerjee and S. Kurungot, *Chem. Mater.*, 2016, **28**, 4375–4379.
